# Supplementary material for: Cyclometalated Ir(iii) complexes based on 2-(2,4-difluorophenyl)-pyridine and 2,2′-(2-phenyl-1H-imidazole-4,5-diyl)dipyridine: acid/base-induced structural transformation and luminescence switching, and photocatalytic activity for hydrogen evolution
Source: Royal Society of Chemistry journal article supplement (doi:10.1039/c7dt01337j), 2017-01-01
Supplement: c7dt01337j1.pdf [file c7dt01337j1.pdf]

## Electronic Supporting Information

### 1. Synthesis of 2,2'-(2-phenyl-1H-imidazole-4,5-diyl)dipyridine (pidpyH)

A mixture of benzaldehyde (2.5 mmol, 0.2653 g), 1,2-bis(2-pyridine)ethane-1,2-dione (2.0 mmol, 0.4240 g), ammonium acetate (40 mmol, 3.1040 g) and HOAc (20 mL) was heated in an oil bath (120 °C) for one day. This mixture was extracted by benzene (30 mL), and then organic phase was evaporated under vacuum. The resultant residue was purified using silica gel column and petroleum ether-ethyl acetate as eluent, obtaining light yellow solid with a yield of 297 mg [50% based on 1,2-bis(2-pyridine)ethane-1,2-dione]. Anal. found (calcd) for  $C_{19}H_{14}N_4$ : C, 76.57 (76.49); H, 5.94 (4.73), N, 18.86 (18.78). IR (KBr,  $cm^{-1}$ ): 3366(w), 3127(m), 1589(m), 1534(w), 1489(w), 1472(w), 1460(m), 1442(w), 1421(w), 1400(s), 1270(w), 1219(w), 1091(w), 1002(w), 977(w), 784(m), 742(w), 699(w), 691(m), 664(w).  $^1H$  NMR (300 MHz,  $CDCl_3$ ),  $\delta$  (ppm): 7.16 and 7.26 (2d, 2H from phenyl group), 7.37-7.49 (m, 3H from phenyl group), 7.68, 7.81, 8.00 and 8.02 (4t, 4H from two pyridyl groups), 8.14-8.69 (4d, 4H from two pyridyl groups).

### 2. Synthesis of $[Ir(dfppy)_2(pidpyH)]Cl$ (1·Cl)

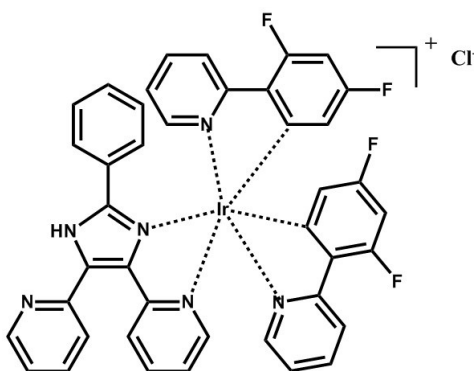

A mixture of pidpyH (0.2 mmol, 0.0629 g) and  $[Ir(dfppy)_2Cl]_2$  (0.1 mmol, 0.1216 g) in  $CH_2Cl_2$  (15 mL) and  $CH_3OH$  (12 mL) was heated in an oil bath (50 °C) under argon for one day. After evaporation under vacuum, the resultant residue was purified through silica column chromatography using  $CH_3OH-CH_2Cl_2$  (v/v = 0-3/100) solution, obtaining a yellow solid of  $[Ir(dfppy)_2(pidpy)]Cl$  (1·Cl) (181mg, 78% based on

[Ir(dfppy)<sub>2</sub>Cl]<sub>2</sub>). Anal. Found (calcd) for C<sub>41</sub>H<sub>26</sub>N<sub>6</sub>F<sub>4</sub>ClIr: C, 54.42 (54.33); H, 3.03 (2.89), N, 9.41 (9.27). IR (KBr, cm<sup>-1</sup>): 3127(w), 1605(s), 1572(m), 1557(m), 1478(s), 1448(s), 1401(w), 1292(w), 1248(w), 1228(w), 1163(w), 1112(w), 1102(w), 987(m), 845(w), 828(w), 784(w), 757(w), 728(w), 702(w). <sup>1</sup>H NMR (400 MHz, CDCl<sub>3</sub>), δ (ppm): 5.18 and 5.20 (d, 1H), 5.65 and 5.68 (d, 1H), 6.07 (t, 1H), 6.42 (t, 1H) [5.18-6.42 ppm: total 4H from two 2,4-difluorophenyl rings of the dfppy<sup>-</sup> units], 6.83-6.97 (m, total 7H: 5H from the phenyl group of pidpyH ligand and 2H from two pyridyl rings of the dfppy<sup>-</sup> units), 7.03-7.18 (2t, 2H from two pyridyl groups of pidpyH ligand), 7.60-7.78 (m, 6H: 4H from two pyridyl rings of the dfppy<sup>-</sup> units and 2H from two pyridyl groups of pidpyH ligand). 8.00-8.20 (d and m, total 4H: 2H from two pyridyl rings of the dfppy<sup>-</sup> units and 2H from a pyridyl group of pidpyH ligand), 8.65 and 9.34 (2d, 2H from two pyridyl groups of pidpyH ligand).

### 3. Synthesis of [Ir(dfppy)<sub>2</sub>(pidpyH<sub>2</sub>)]2Cl (1H·2Cl)

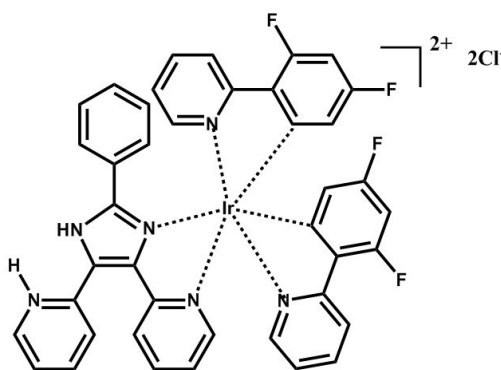

A mixture of **1·Cl** (0.024 mmol, 24 mg) in CHCl<sub>3</sub> (5 mL) and HCl (6M, 2 mL) was stirred for 2 hours at room temperature. The mixture was allowed to slowly evaporated, obtaining yellow needlelike crystals of **1H·2Cl** (22 mg, 89% based on **1·Cl**). Anal. found (calcd) for C<sub>41</sub>H<sub>27</sub>N<sub>6</sub>F<sub>4</sub>Cl<sub>2</sub>Ir: C, 52.38 (52.23); H, 3.07 (2.89), N, 9.06 (8.91). IR (KBr, cm<sup>-1</sup>): 3382(w), 3134(m), 2975(w), 1604(w), 1576(w), 1559(w), 1477(w), 1402(s), 1294(w), 1248(w), 1162(w), 1090(w), 1050(m), 991(w), 881(w), 829(w), 787(w), 759(w), 699(w), 569(w). <sup>1</sup>H NMR (400 MHz, CDCl<sub>3</sub>), δ (ppm): 5.38 and 5.40 (d, 1H), 5.69 and 5.71 (d, 1H), 6.11 (t, 1H), 6.52 (t, 1H) [5.38-6.52 ppm: total 4H from two 2,4-difluorophenyl rings of the dfppy<sup>-</sup> units], 6.97-7.16 (two broad

peaks, 8H), 7.52 (one broad peak, 1H), 7.71-8.03 (m, 6H), 8.30-8.85 (m, 6H) [6.97-7.16 ppm and 7.71-8.85 pm: total 21H: 8H from two pyridyl rings of two dfppy units and 13 H from pidpyH ligand)

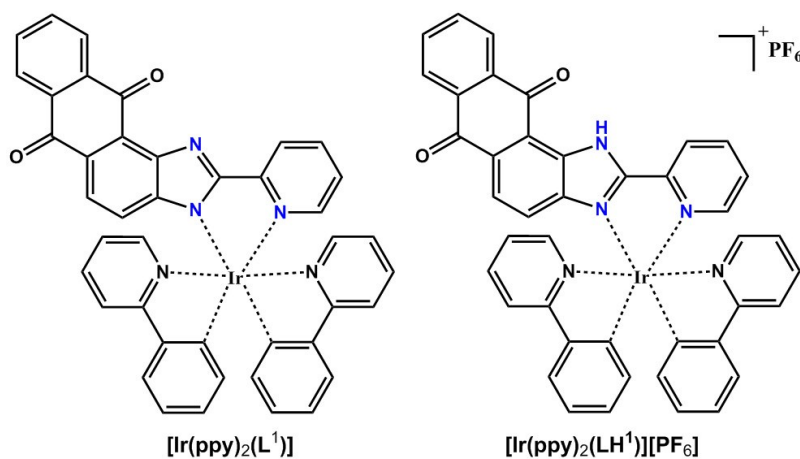

Scheme S1

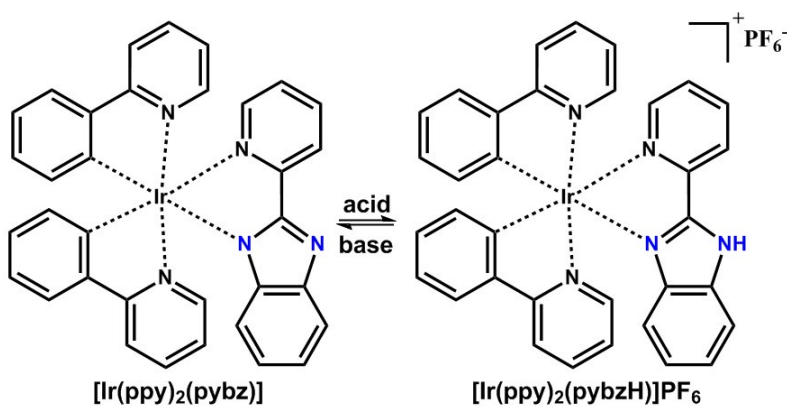

Scheme S2

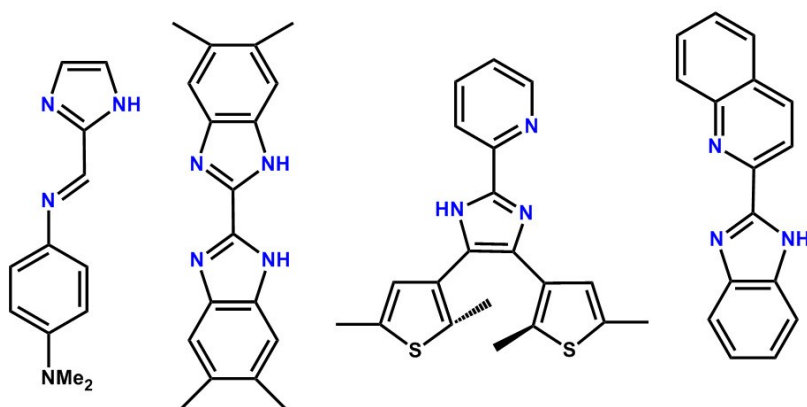

Scheme S3

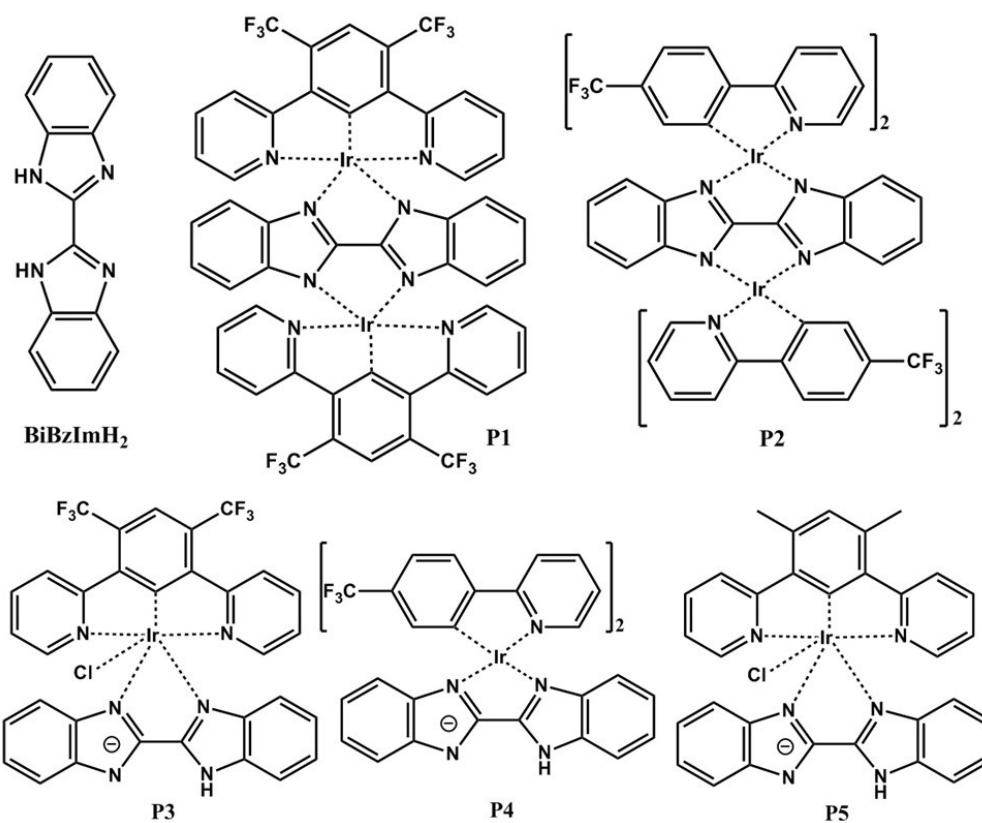

Scheme S4

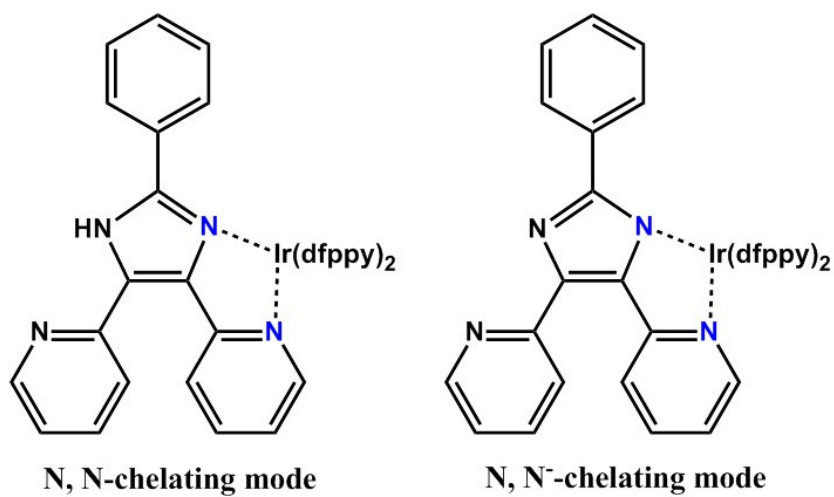

Scheme S5

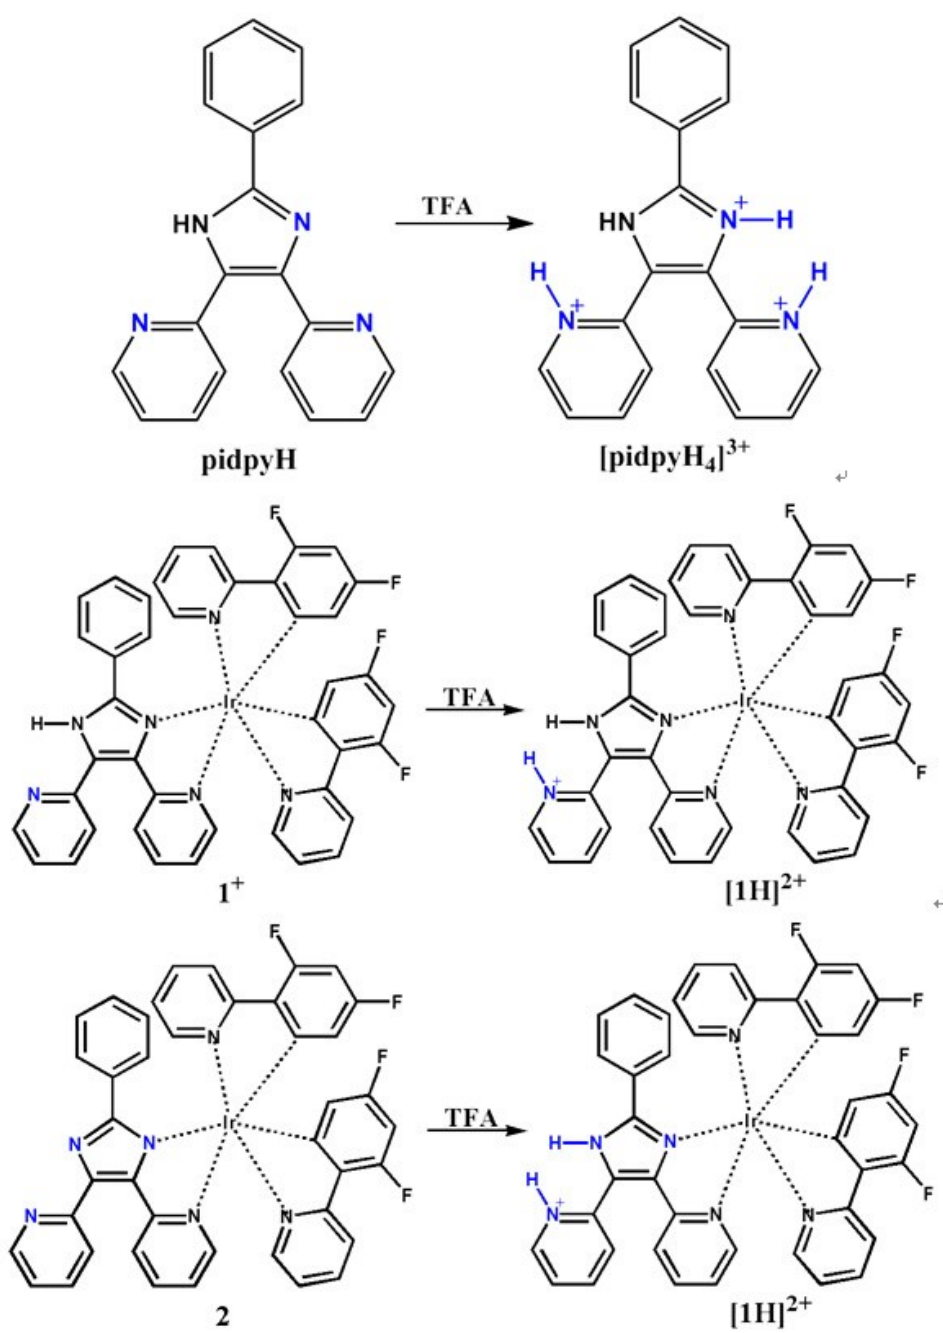

Scheme S6

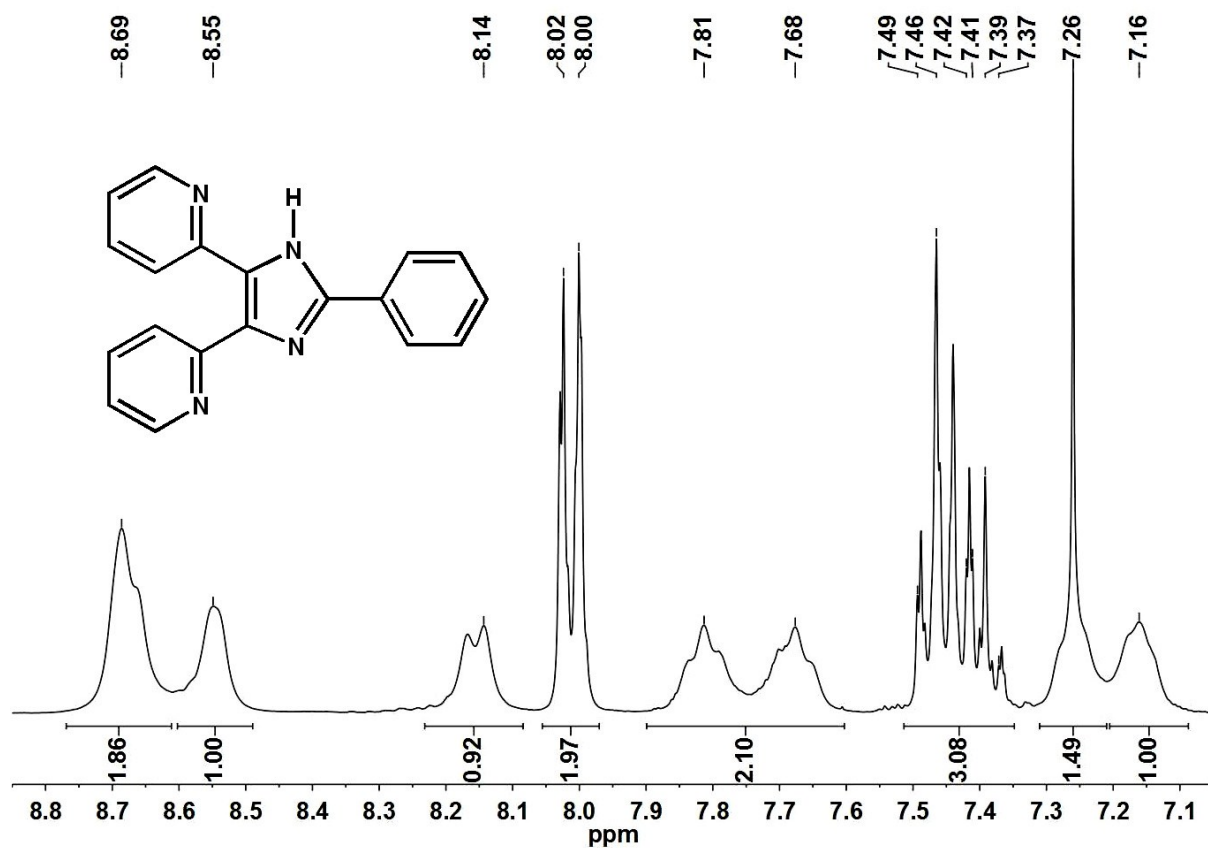

Fig. S1  $^1\text{H}$  NMR spectrum of pidpyH (300 MHz,  $\text{CDCl}_3$ ).

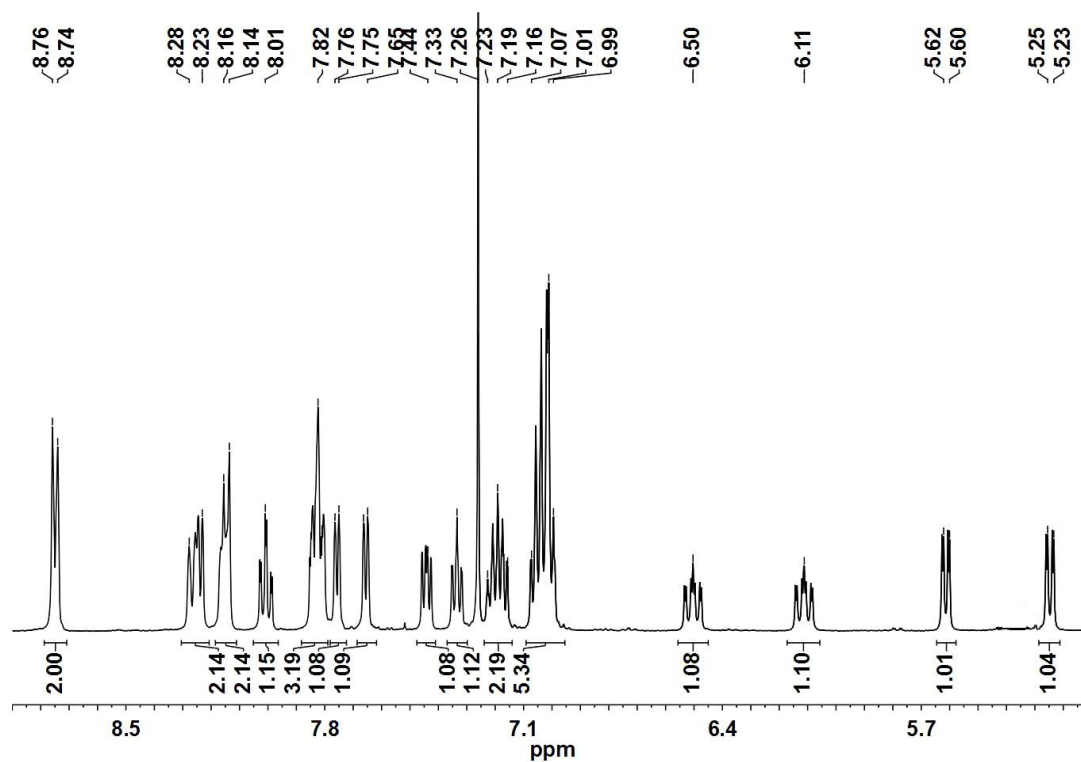

Fig. S2  $^1\text{H}$  NMR spectrum of **1**· $\text{PF}_6$  (400 MHz,  $\text{CDCl}_3$ ).

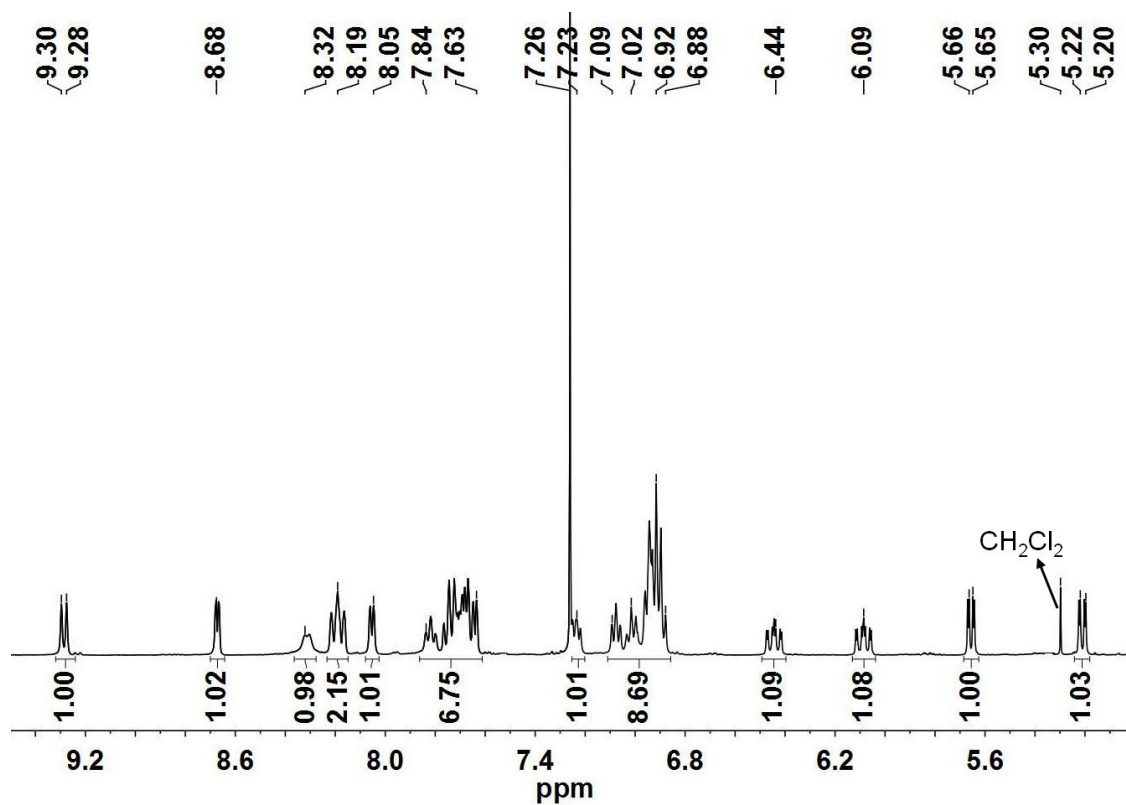

Fig. S3 <sup>1</sup>H NMR spectrum of 2 (400 MHz, CDCl<sub>3</sub>).

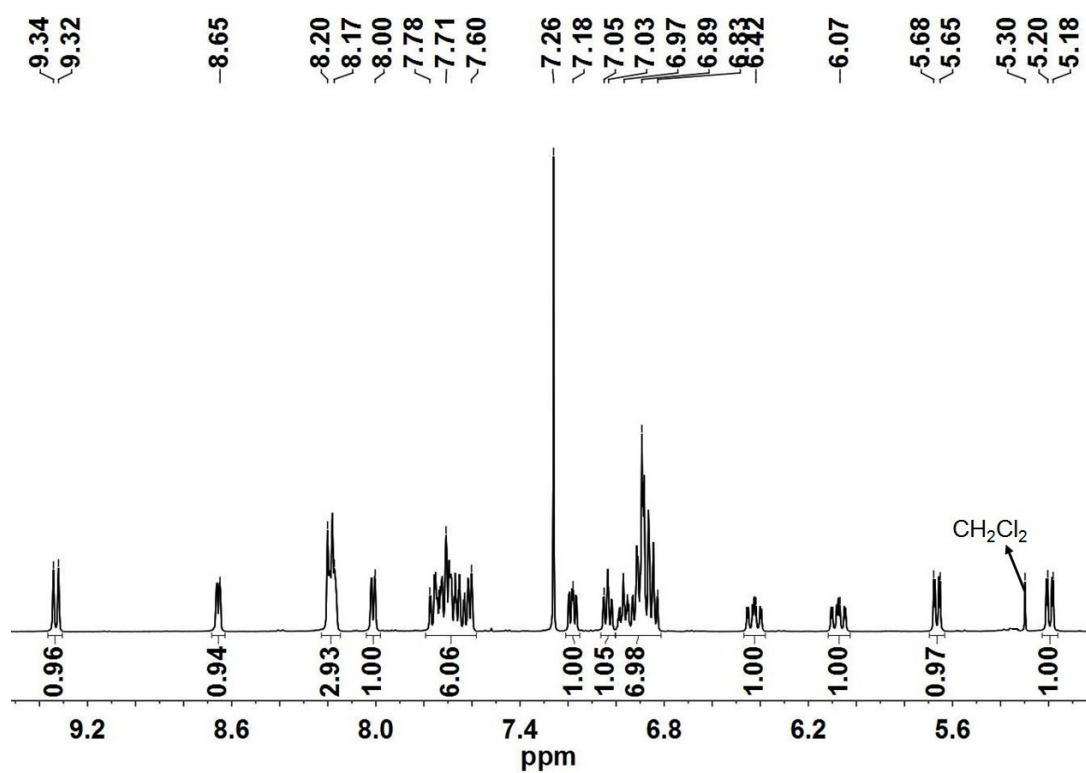

Fig. S4 <sup>1</sup>H NMR spectrum of 1·Cl (400 MHz, CDCl<sub>3</sub>).

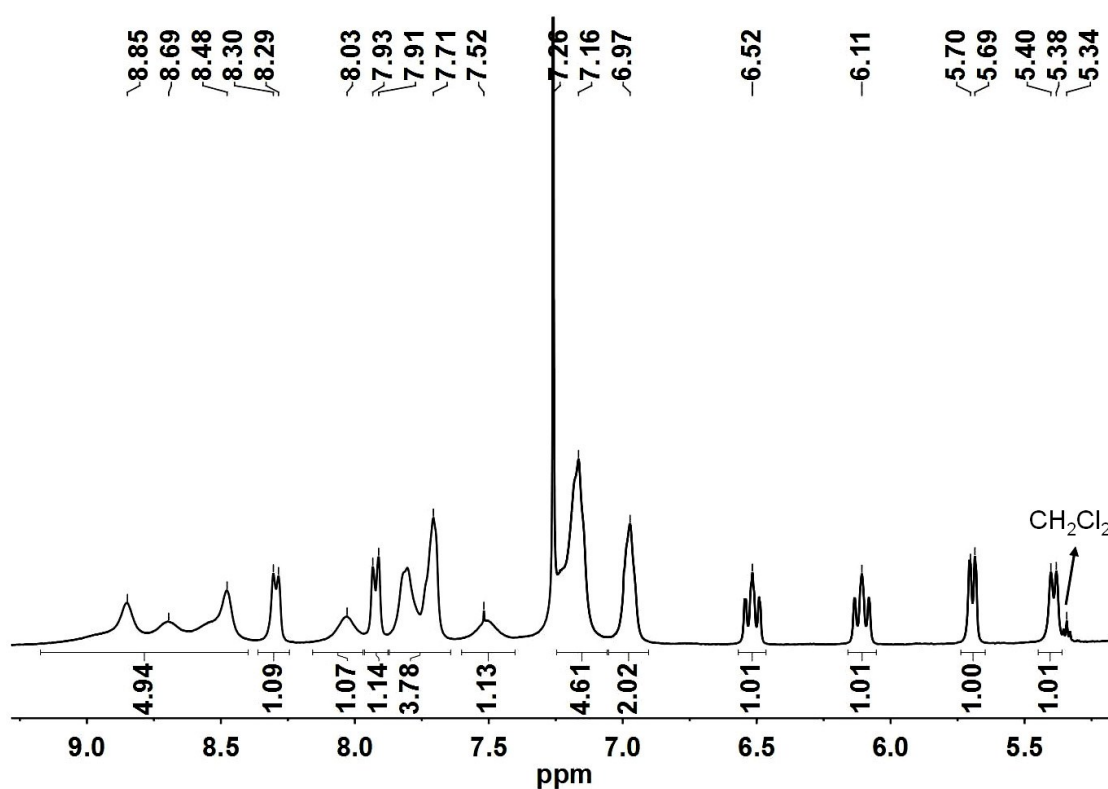

**Fig. S5** <sup>1</sup>H NMR spectrum of **1H·2Cl** (400 MHz, CDCl<sub>3</sub>).

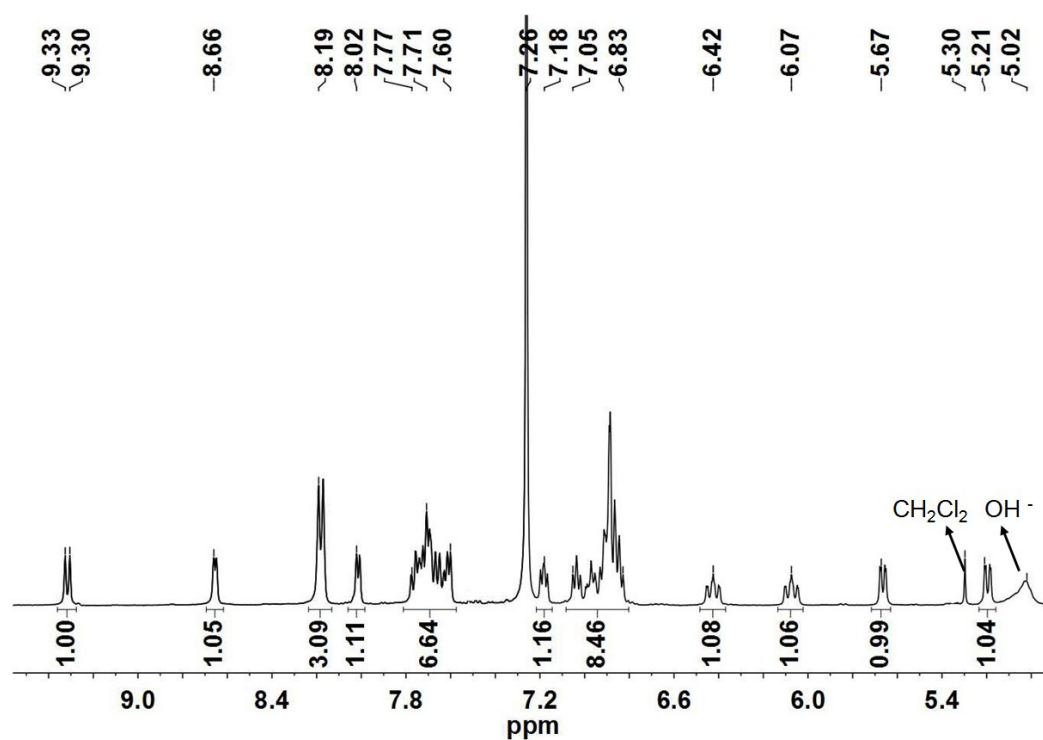

**Fig. S6** <sup>1</sup>H NMR spectrum of **1·PF6** (400 MHz, CDCl<sub>3</sub>) after adding a D<sub>2</sub>O solution of NaOH (The signal at 5.02 ppm could be from OH<sup>-</sup> in the solution, seeing *J. Org. Chem.*, 1997, 62, 7512.).



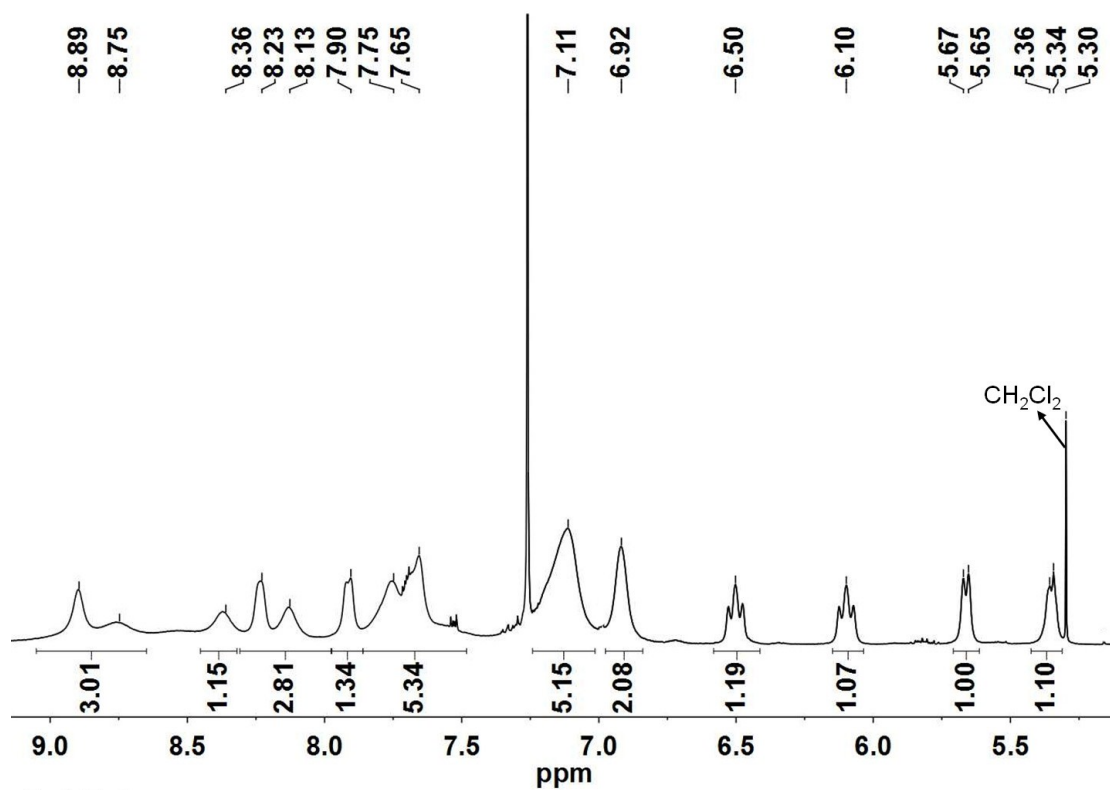

Fig. S7 <sup>1</sup>H NMR spectrum of 2 (400 MHz, CDCl<sub>3</sub>) after adding DCl.

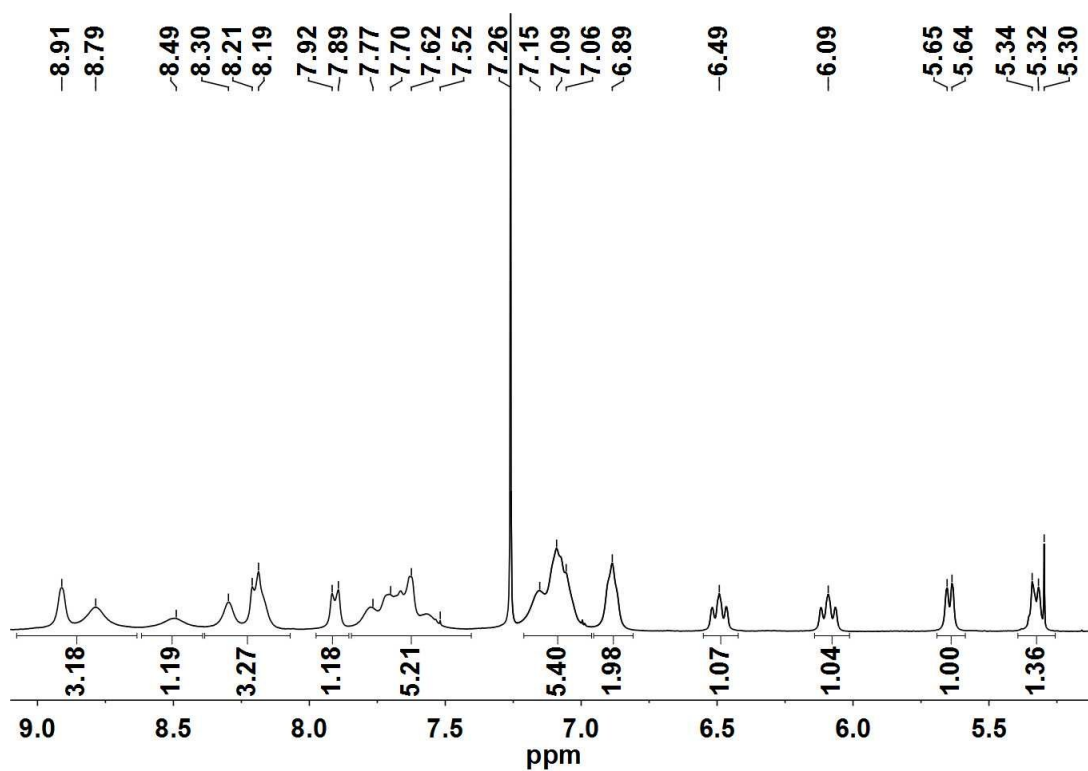

Fig. S8 <sup>1</sup>H NMR spectrum of 1·Cl + DCl (400 MHz, CDCl<sub>3</sub>).

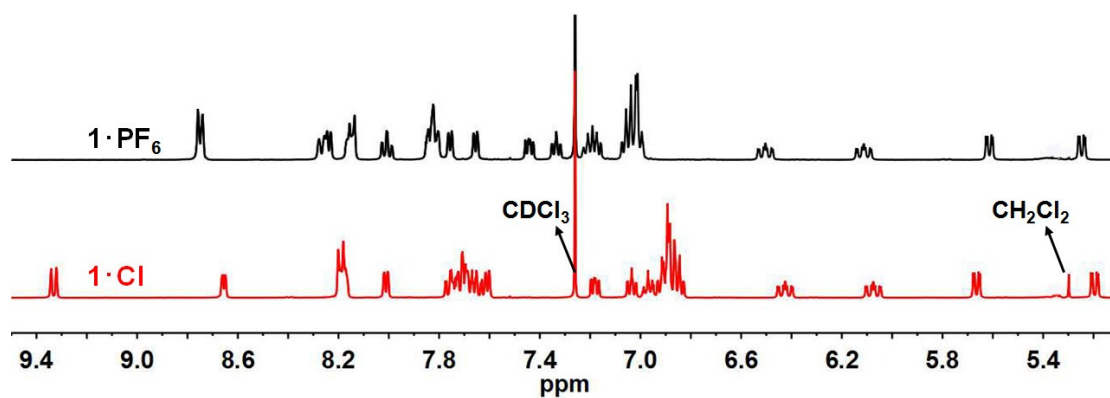

**Fig. S9**  $^1\text{H}$  NMR spectra comparison between  $1 \cdot \text{PF}_6$  and  $1 \cdot \text{Cl}$ .

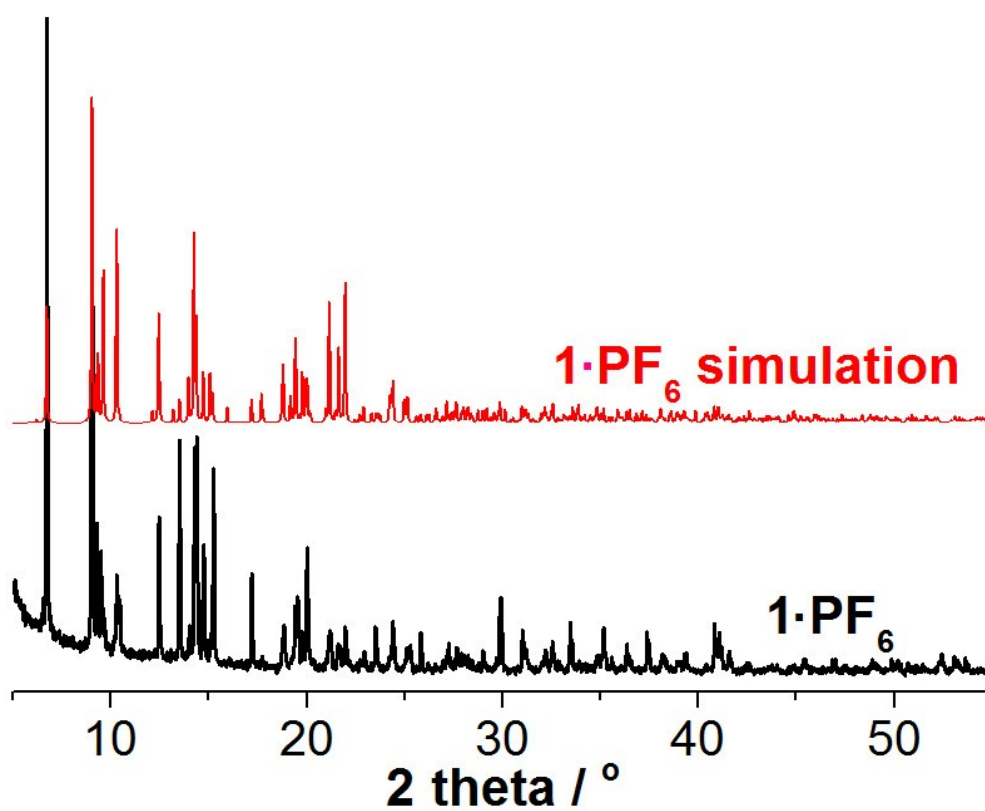

**Fig. S10** Experimental and simulated XRD patterns of  $1 \cdot \text{PF}_6$ .

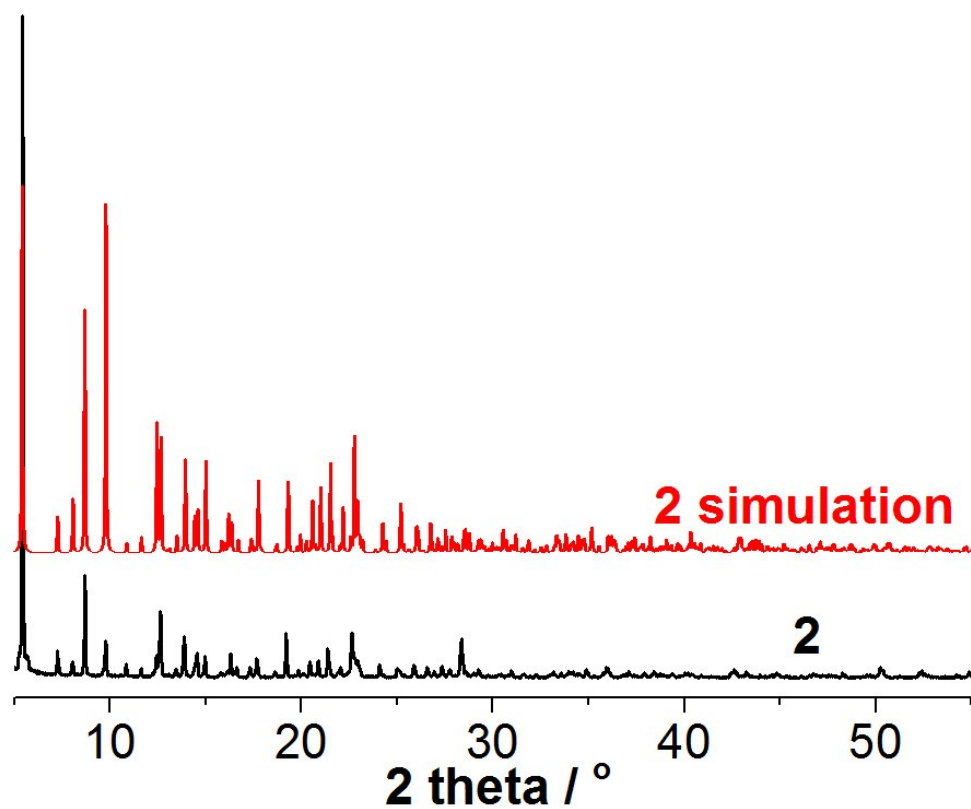

**Fig. S11** Experimental and simulated XRD patterns of **2**.

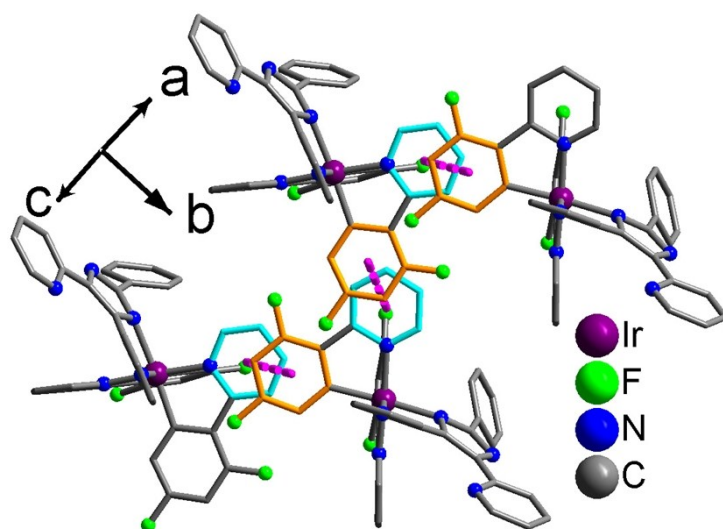

**Fig. S12** Supramolecular chain structure in **2** with aromatic stacking interactions. All H atoms are omitted for clarity.

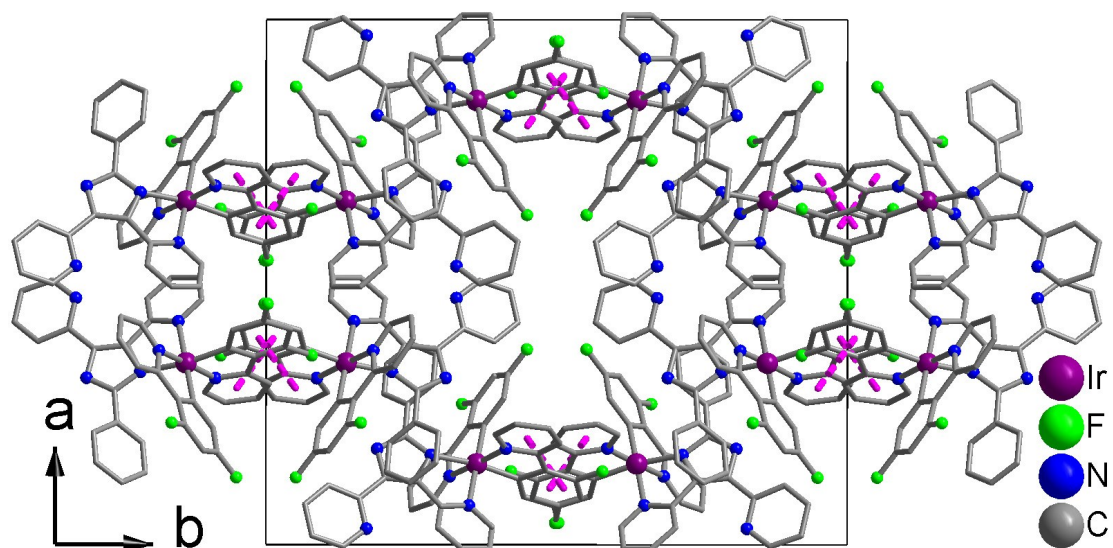

**Fig. S13** Packing structure of **2**.

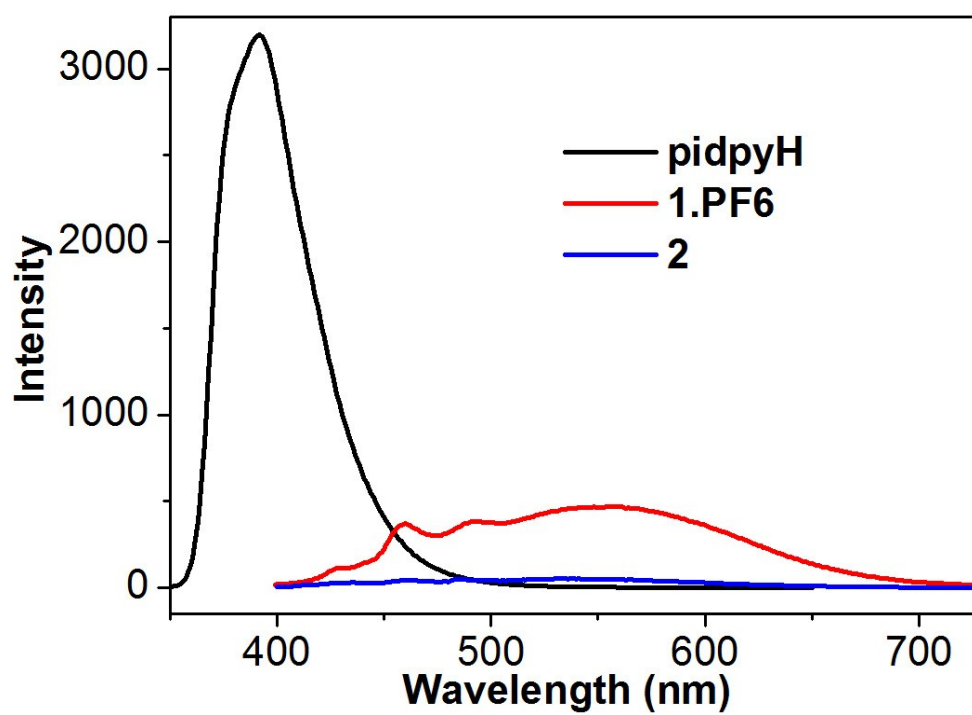

**Fig. S14** Luminescence spectra of pidpyH, **1**·PF<sub>6</sub> and **2** in CH<sub>2</sub>Cl<sub>2</sub> ( $c = 1 \times 10^{-4}$  M,  $\lambda_{\text{ex}} = 332$  nm for pidpyH, and  $\lambda_{\text{ex}} = 377$  nm for **1**·PF<sub>6</sub> and **2**).

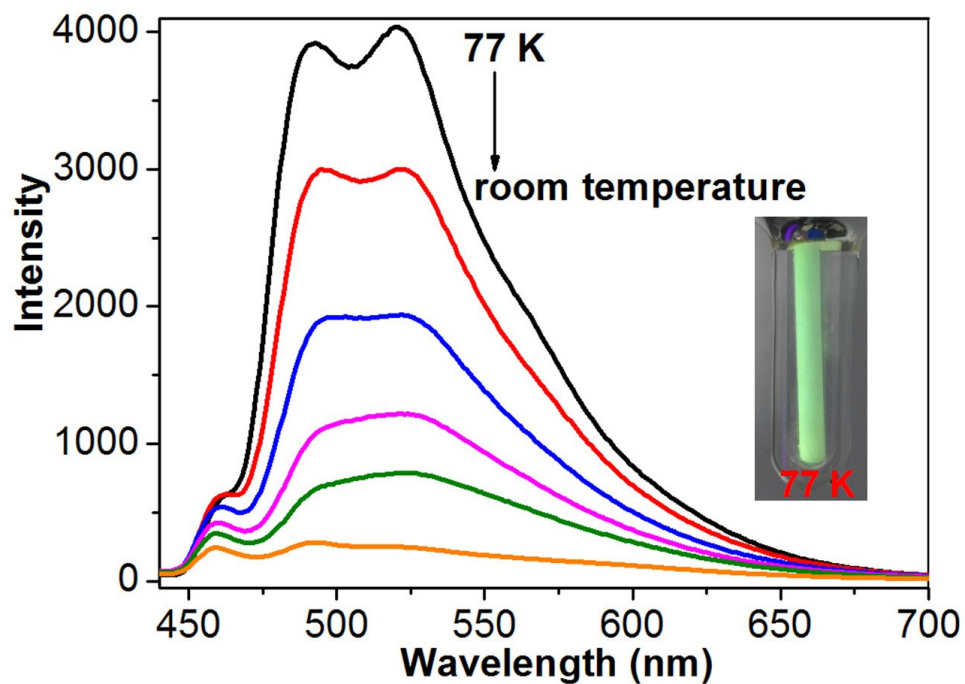

**Fig. S15** Luminescence spectral changes of **1·PF<sub>6</sub>** in CH<sub>2</sub>Cl<sub>2</sub> upon increasing temperature from 77 K to room temperature ( $c = 1.0 \times 10^{-4}$  M,  $\lambda_{\text{ex}} = 377$  nm).

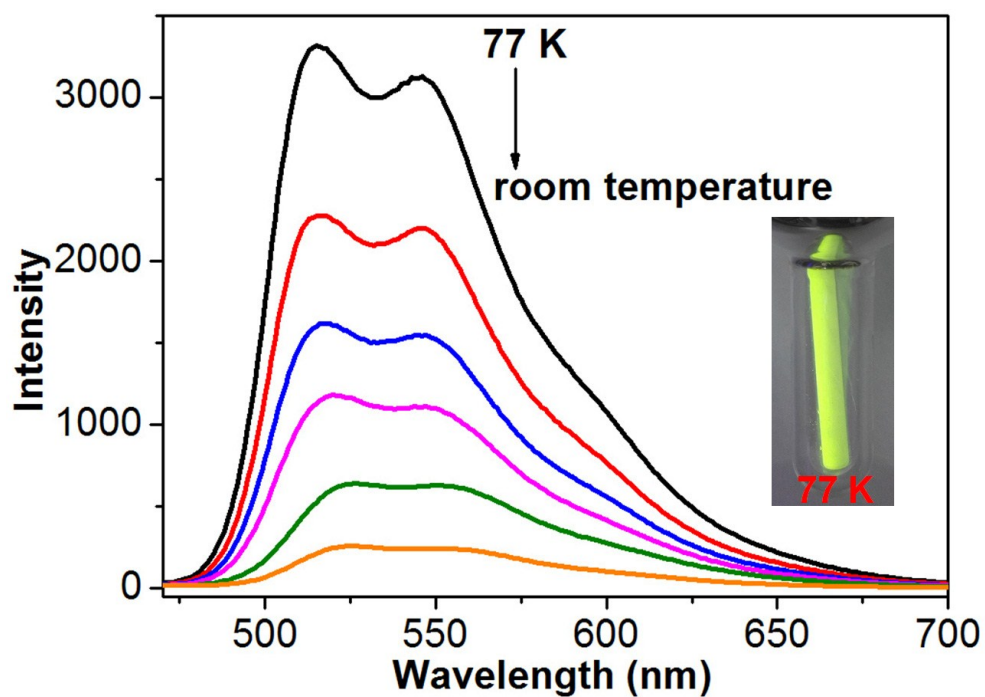

**Fig. S16** Luminescence spectral changes of **2** in CH<sub>2</sub>Cl<sub>2</sub> upon increasing temperature from 77 K to room temperature ( $c = 1.0 \times 10^{-4}$  M,  $\lambda_{\text{ex}} = 377$  nm).

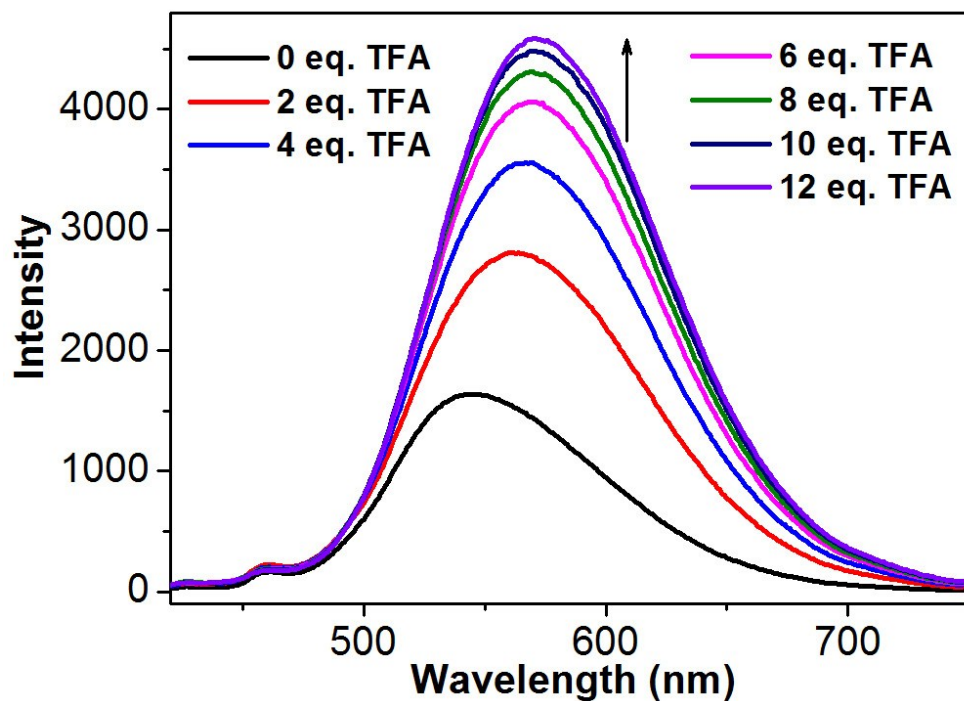

**Fig. S17** Luminescence spectral changes of  $[\text{Ir}(\text{dfppy})_2(\text{pidpyH}_2)]_2\text{Cl}$  (**1H·2Cl**) in  $\text{CH}_2\text{Cl}_2$  ( $c = 1 \times 10^{-4} \text{ M}$ ,  $\lambda_{\text{ex}} = 377 \text{ nm}$ ) upon adding TFA.

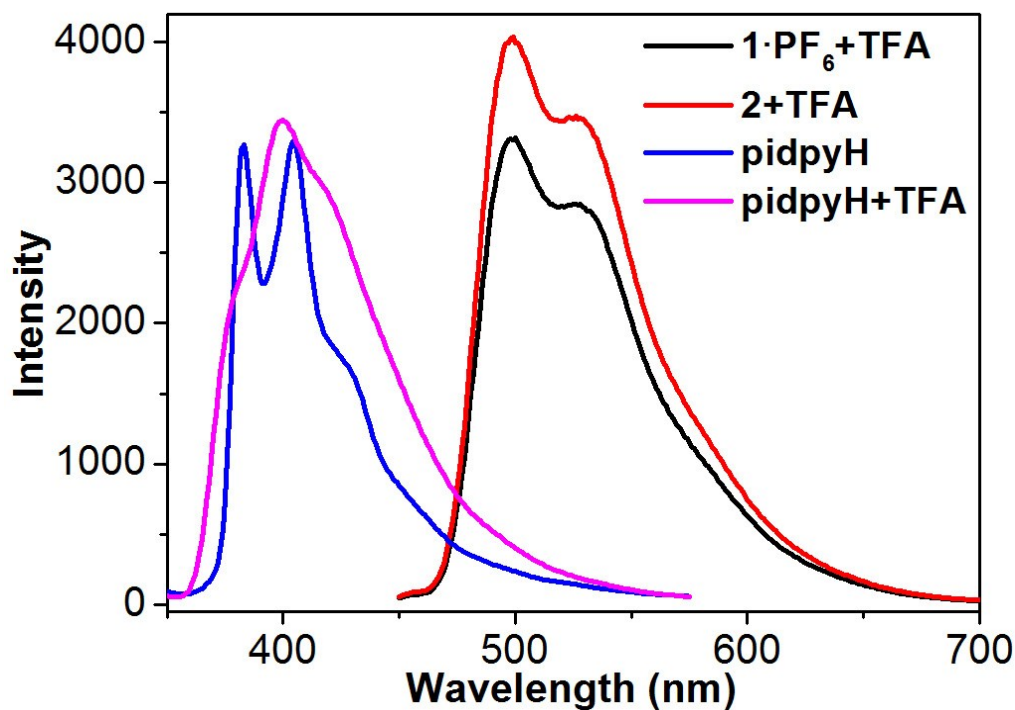

**Fig. S18** Luminescence spectra of pidpyH, **1·PF<sub>6</sub>** and **2** in  $\text{CH}_2\text{Cl}_2$  at 77 K before and/or after adding TFA (6 eq., 11 eq. and 18 eq., respectively) ( $c = 1.0 \times 10^{-4} \text{ M}$ ,  $\lambda_{\text{ex}} = 377 \text{ nm}$ ).



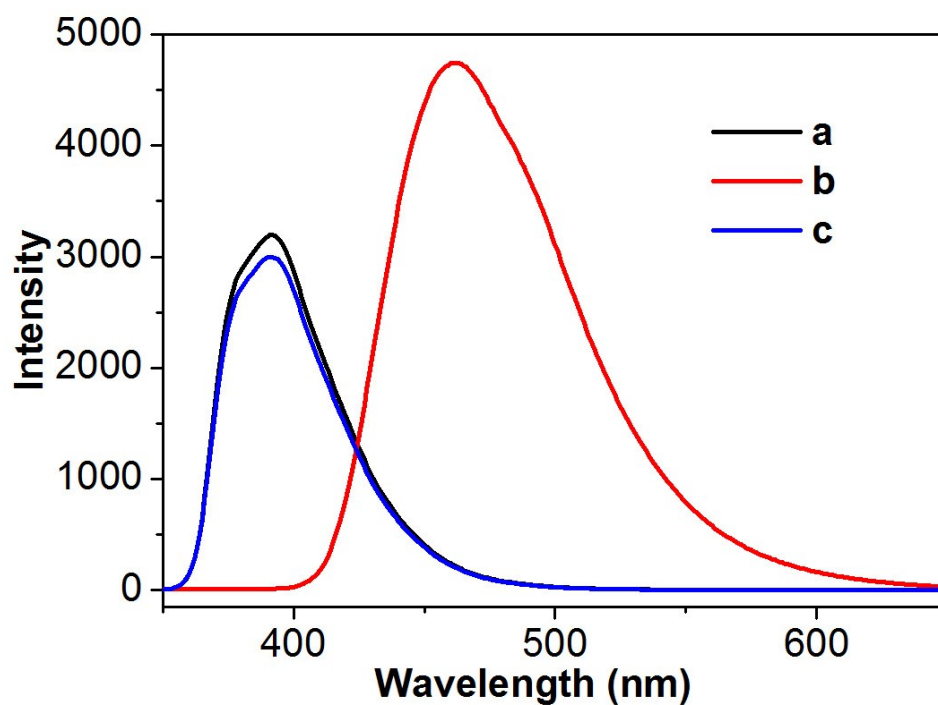

**Fig. S19** Luminescence spectra of pidpyH ( $c = 1 \times 10^{-4}$  M for pidpyH,  $\lambda_{\text{ex}} = 332$  nm) in  $\text{CH}_2\text{Cl}_2$  (plot a), in  $\text{CH}_2\text{Cl}_2$  containing 6 eq. TFA (plot b), and in  $\text{CH}_2\text{Cl}_2$  containing 6.5 eq. TFA and 7 eq.  $\text{NEt}_3$  (plot c).

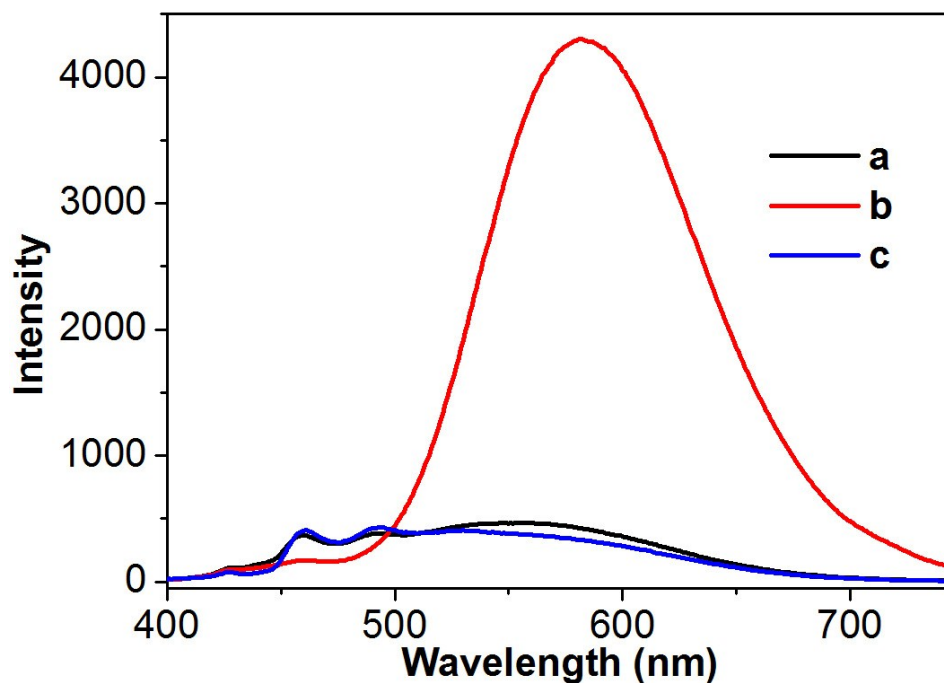

**Fig. S20** Luminescence spectra of  $1\cdot\text{PF}_6$  ( $c = 1 \times 10^{-4}$  M,  $\lambda_{\text{ex}} = 377$  nm) in  $\text{CH}_2\text{Cl}_2$  (plot a), in  $\text{CH}_2\text{Cl}_2$  containing 11 eq. TFA (plot b), and in  $\text{CH}_2\text{Cl}_2$  containing 11 eq. TFA and 12 eq.  $\text{NEt}_3$  (plot c).

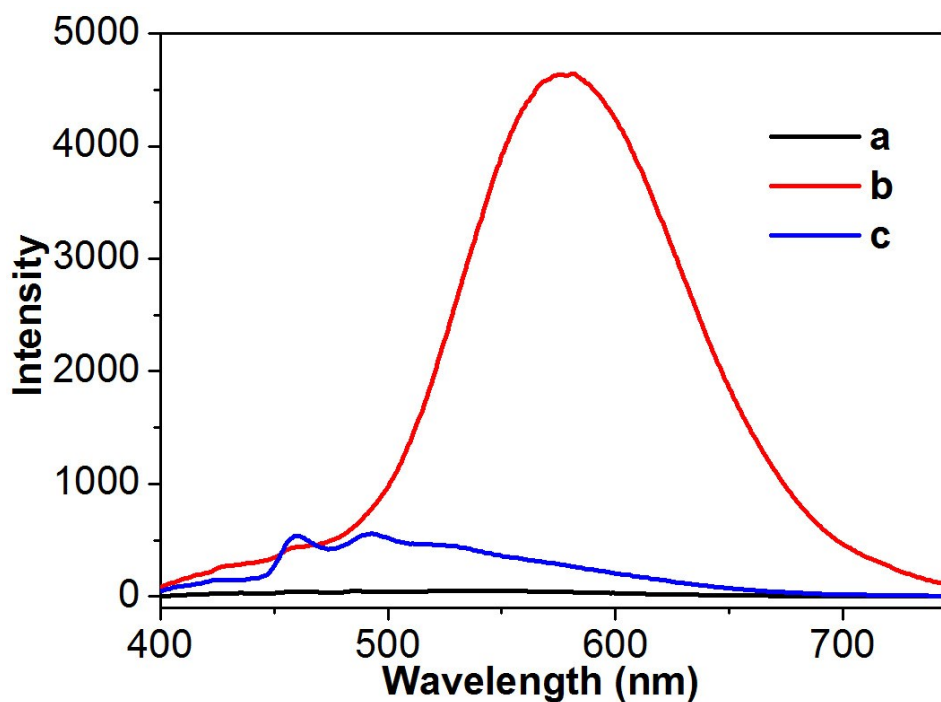

**Fig. S21** Luminescence spectra of **2** ( $c = 1 \times 10^{-4}$  M,  $\lambda_{\text{ex}} = 377$  nm) in  $\text{CH}_2\text{Cl}_2$  (plot a), in  $\text{CH}_2\text{Cl}_2$  containing 18 eq. TFA (plot b), and in  $\text{CH}_2\text{Cl}_2$  containing 18 eq. TFA and 19 eq.  $\text{NEt}_3$  (plot c).

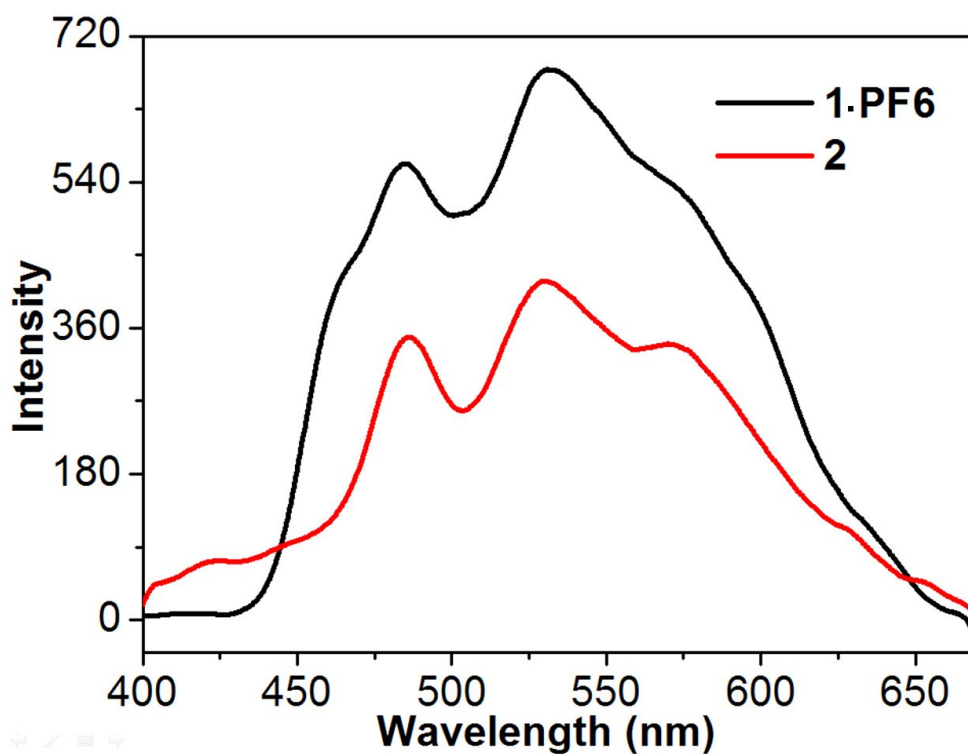

**Fig. S22** Solid-state emission spectra of **1·PF<sub>6</sub>** and **2** at room temperature ( $\lambda_{\text{ex}} = 375$  nm).
